# Supplementary material for: Robust superhydrophobic coating and the anti-icing properties of its lubricants-infused-composite surface under condensing condition
Source: Royal Society of Chemistry journal article supplement (doi:10.1039/c6nj02824a), 2017-01-01
Supplement: c6nj02824a1.pdf [file c6nj02824a1.pdf]

## Electronic Supplementary Information

### Robust superhydrophobic coating and the anti-icing study of its lubricants-infused-composited surface under condensing condition

Nan Wang,<sup>a,b</sup> Dangsheng Xiong,<sup>\*,a,b</sup> Sai Pan,<sup>a</sup> Kun Wang,<sup>a</sup> Yan Shi,<sup>b</sup> and Yaling Deng<sup>b</sup>

<sup>a</sup> School of Materials Science and Engineering, Nanjing University of Science and Technology, Nanjing 210094, Jiangsu, P. R. China

<sup>b</sup> Jiangsu Key Laboratory of Advanced Micro/Nano Materials and Technologies, Nanjing 210094, Jiangsu, P. R. China

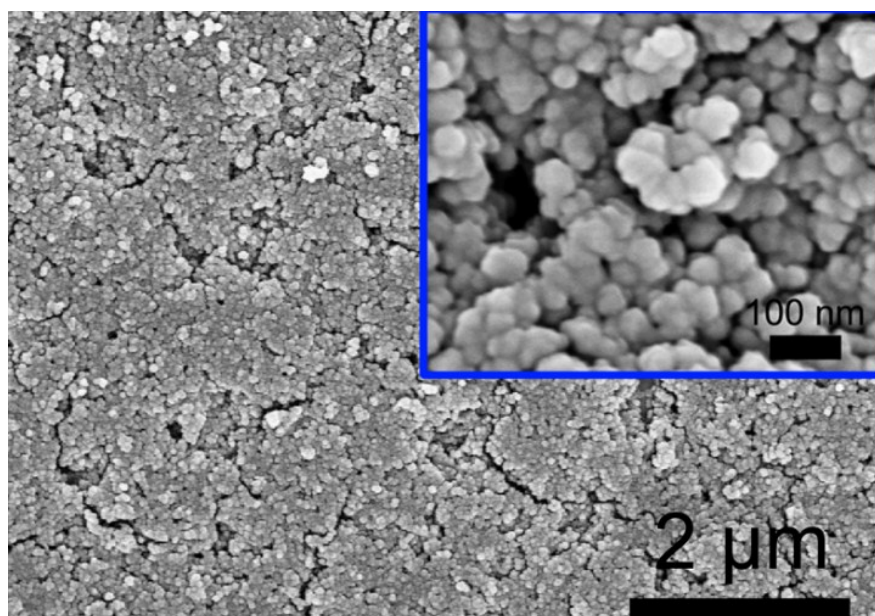

Figure S1. SEM images of SiO<sub>2</sub> nanoparticles.

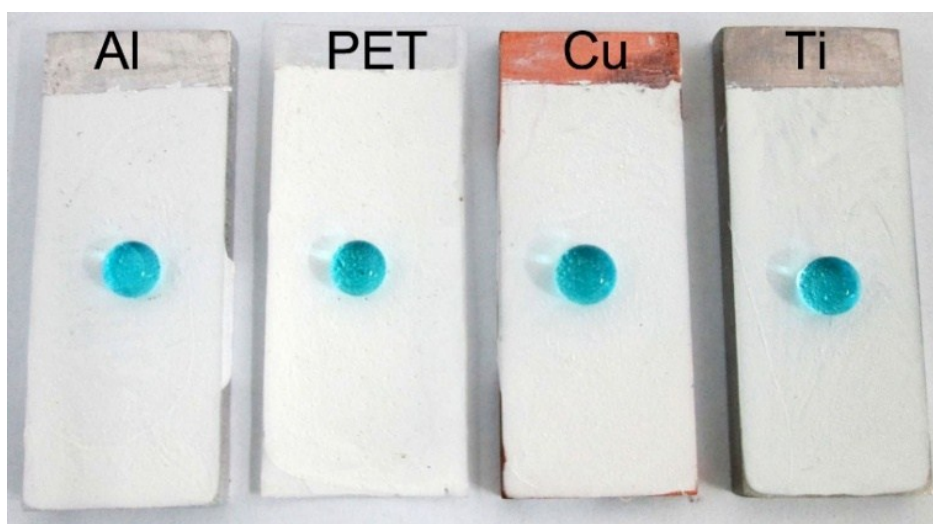

Figure S2. Superhydrophobic coatings on Al, PET (wallpaper), Cu and Ti alloy substrates.

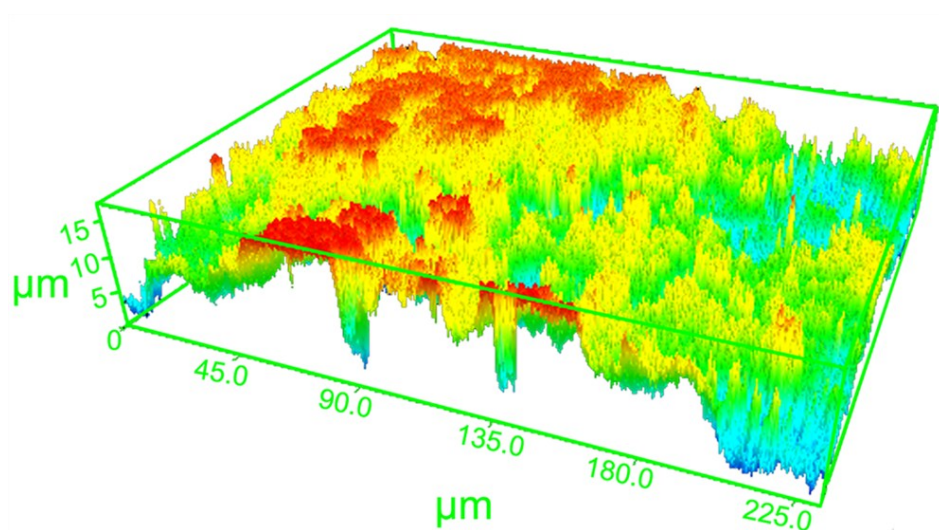

Figure S3. True color confocal microscopy images of P4.

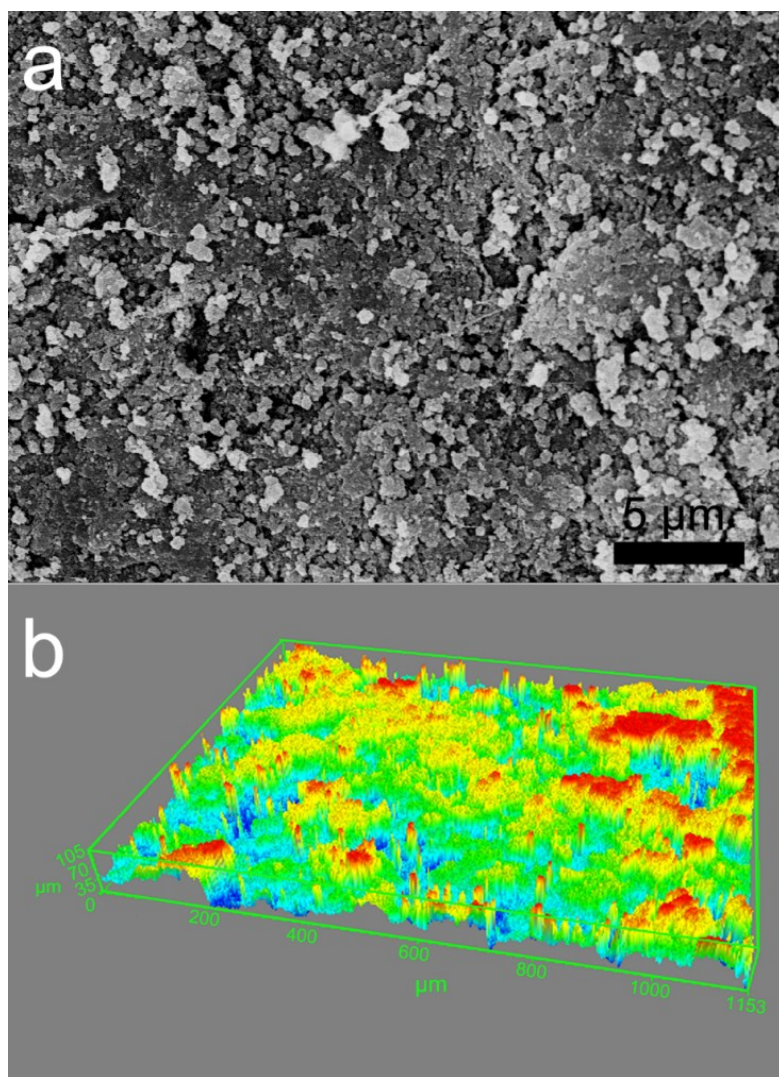

Figure S4. (a) SEM and (b) 3D morphology of P4 after being abraded for over 10 m.

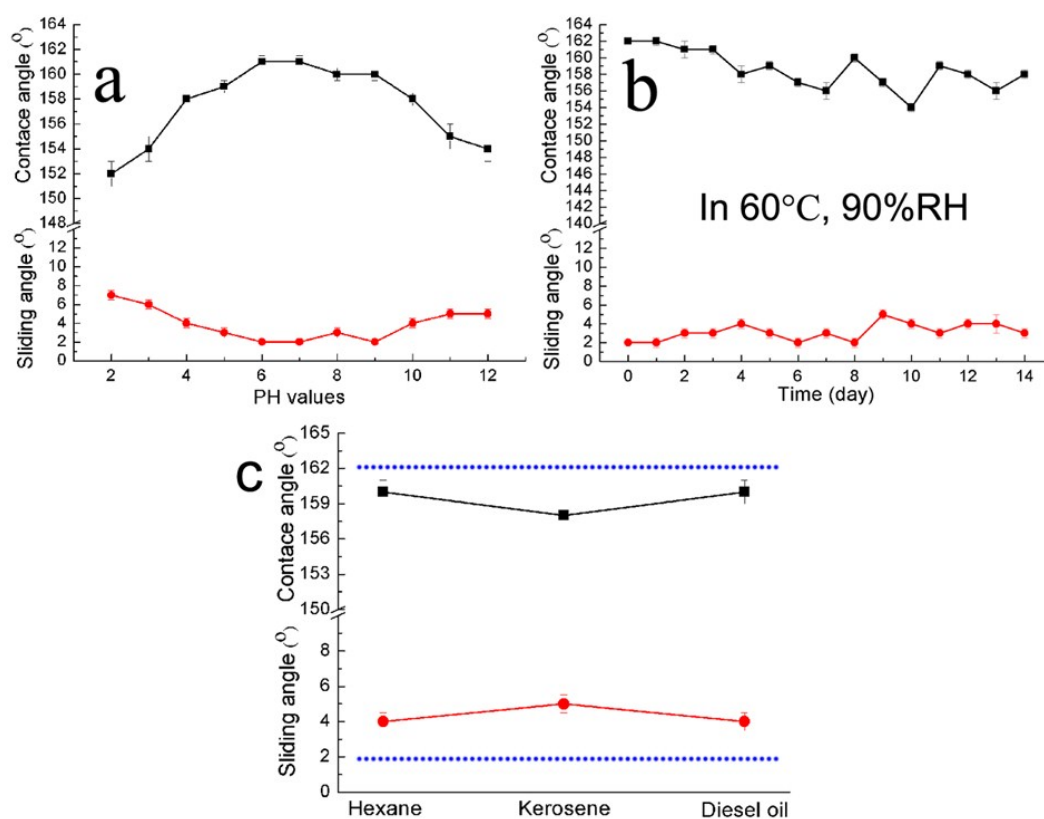

Figure S5. **(a)** Surface wettability after being immersed in water with different pH values. **(b)** Variations of CA and SA values in 60 °C, 90 %RH condition. **(c)** Wettability after being immersed in different oil

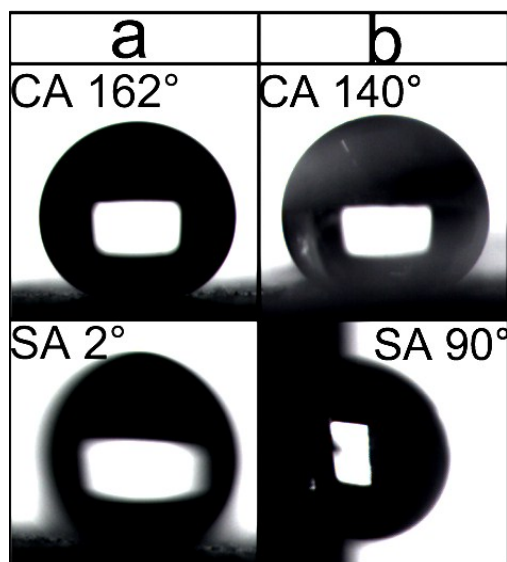

Figure S6. Contact/sliding angles of P4 in the **(a)** ambient and **(b)** 0 °C condition.

Table S1. Loss in thickness of different bare substrates

|                             | Steel | Al  | Cu  | Ti  | PET |
|-----------------------------|-------|-----|-----|-----|-----|
| Wear loss ( $\mu\text{m}$ ) | 4.4   | 6.3 | 5.5 | 4.6 | 9   |
